# Supplementary material for: The impact of health literacy environment on patient stress: a systematic review
Source: Springer Nature journal article supplement (doi:10.1186/s12889-020-08649-x), 2020-05-24
Supplement: MOESM1 [file 18009068]

## APPRAISAL QUESTIONS

| Q No.        | Appraisal Question                                                                 | Yes | No                     | Can't tell or<br>Mixed response |
|--------------|------------------------------------------------------------------------------------|-----|------------------------|---------------------------------|
| 1            | Is the purpose of the study clear and well defined?                                | 2   | 0                      | 1                               |
| 2            | Is the population well defined and properly selected?                              | 2   | 0                      | 1                               |
| 3            | Are the methods clearly described and appropriate for the type of study reported?  | 2   | 0                      | 1                               |
| 4            | Are the results presented in a clear and understandable format?                    | 2   | 0                      | 1                               |
| 5            | Does the interpretation of the results seem consistent with the results presented? | 2   | 0                      | 1                               |
| 6            | Are there any other explanations that could account for these results?             | 0   | 2                      | 1                               |
| Total score: |                                                                                    |     | <i>(Maximum of 12)</i> |                                 |

**RECOMMENDATION:**Include Exclude Seek further information 

Comments (including reasons for exclusions): \_\_\_\_\_

*(Questions derived from Oxman & Guyatt, 1994; JBI Criteria;*
